# Supplementary material
Source: PubMed Central journal article supplement (PMC3549029)
Supplement: NIHMS423052-supplement-2.pdf [file NIHMS423052-supplement-2.pdf]

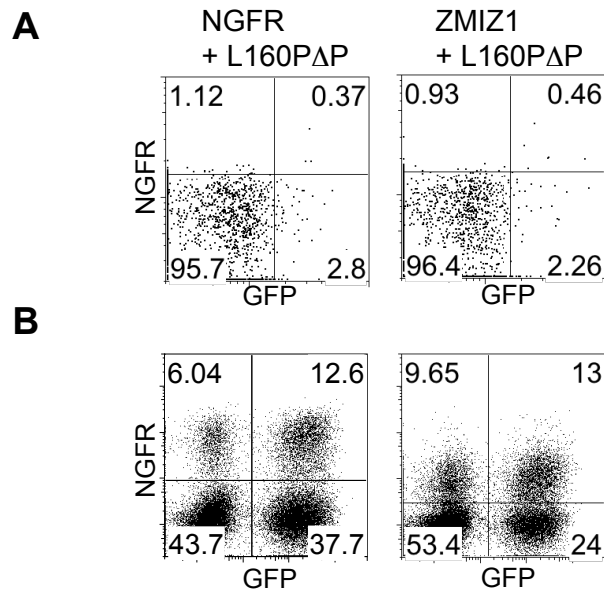

**Figure S1. Retroviral transduction efficiency.** (A) 5-FU-treated donor BM cells were transduced with GFP-expressing retrovirus (L160PΔP) and NGFR-expressing retrovirus (NGFR control vector or ZMIZ1). After 18 hours the cells were analyzed for transduction efficiency by flow cytometry prior to transfer into irradiated recipient mice. (B) To assess retroviral titer, 8946 cells were transduced using the same cocktails as in (A). After 48 hours the cells were analyzed for transduction efficiency by flow cytometry. 8946 is a murine T-ALL cell line(27).
