# Supplementary material
Source: PubMed Central journal article supplement (PMC3549029)
Supplement: NIHMS423052-supplement-4.pdf [file NIHMS423052-supplement-4.pdf]

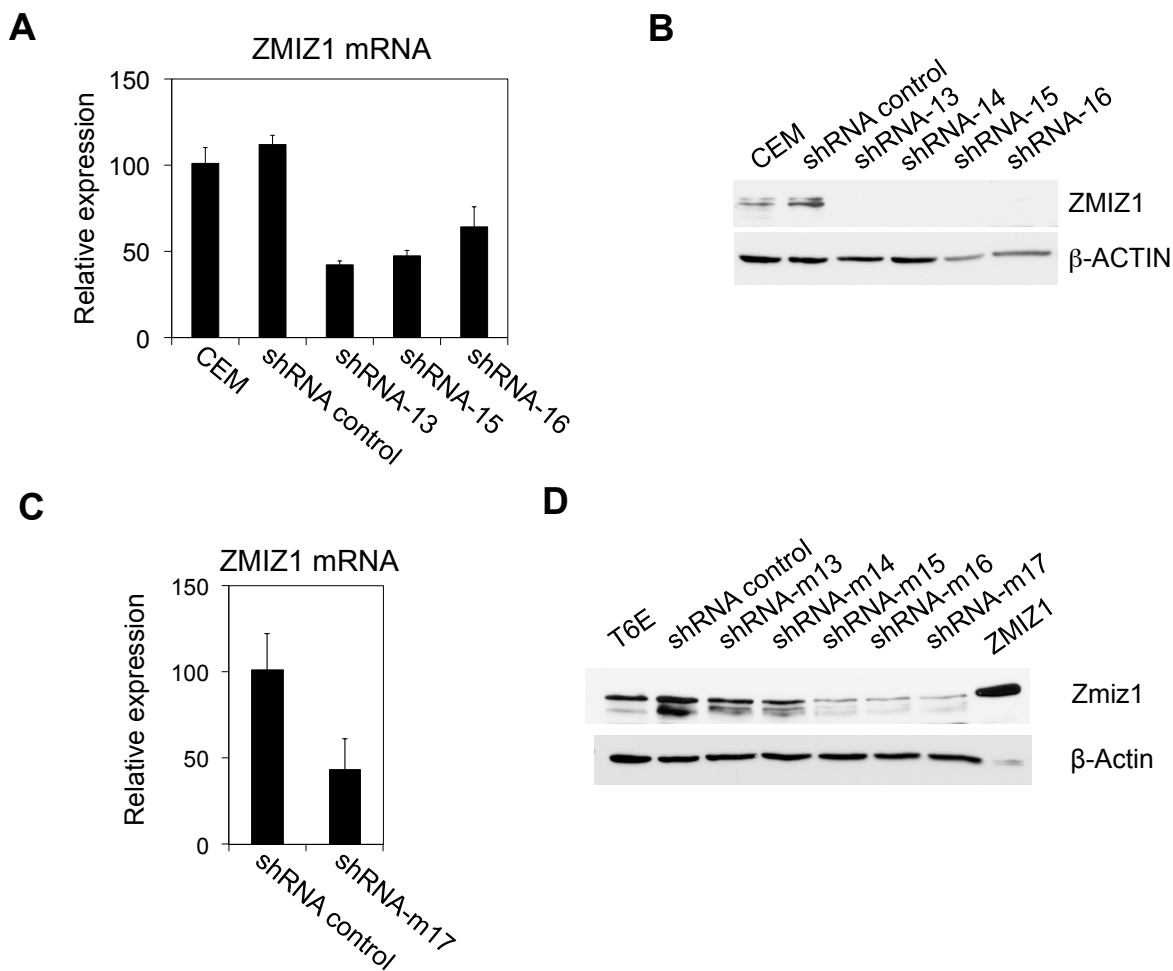

**Figure S3. ZMIZ1 RNA and protein levels were reduced by ZMIZ1-targeted shRNA.** CEM cells were transduced with nonsilencing shRNA control or indicated ZMIZ1-silencing shRNA. 5 days later, ZMIZ1 mRNA was measured using qPCR (A) or Western blot (B).  $\beta$ -ACTIN expression is shown as loading control. T6E cells were transduced with nonsilencing shRNA control or indicated Zmiz1-silencing shRNA. 7 days later, Zmiz1 mRNA was measured using qPCR (C) or Western blot (D). ZMIZ1 lane = positive control, 8946 cells transduced with ZMIZ1 and L1601P $\Delta$ P retroviruses.  $\beta$ -ACTIN expression is shown as loading control. Values are shown as means  $\pm$  standard deviation.
