# Supplementary material
Source: PubMed Central journal article supplement (PMC3549029)
Supplement: NIHMS423052-supplement-5.pdf [file NIHMS423052-supplement-5.pdf]

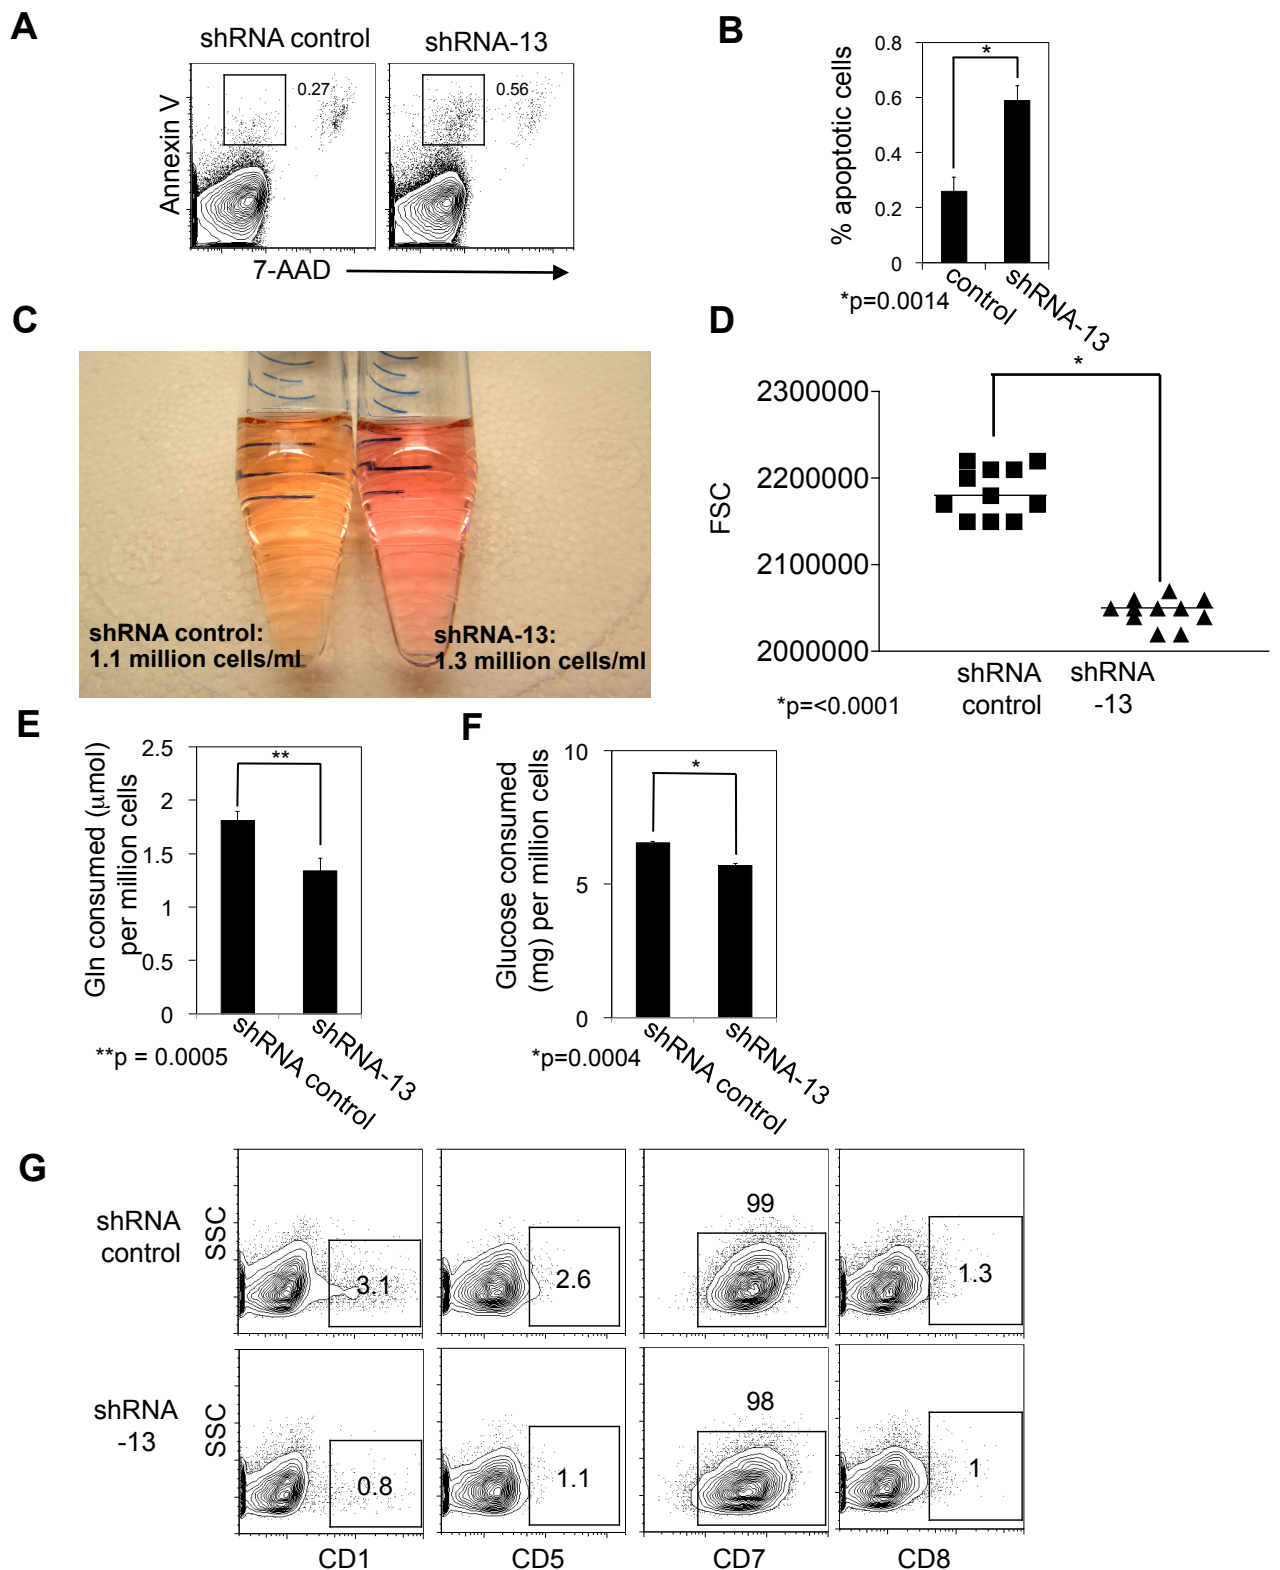

**Figure S4. Cellular consequences of ZMIZ1 knockdown.** (A-F) CEM cells were transduced in triplicate with a nonsilencing control shRNA or ZMIZ1-silencing shRNA-13. The cells were stained with anti-Annexin V antibody and 7-AAD and then analyzed by flow cytometry. Apoptotic cells (Annexin V<sup>+</sup>/7-AAD<sup>-</sup>) are shown in the box in (A) and graphed in (B). (C) The supernatants of control CEM cells (left) or ZMIZ1-silenced CEM cells (right) are shown. Cell concentrations are indicated. (D) Control shRNA-transduced and ZMIZ1 shRNA-transduced CEM cells were analyzed for cell size (FSC) by flow cytometry (N=11). (E) Glutamine consumption was determined using the Sigma Glutamine/Glutamate Kit (GLN-1). (F) Glucose consumption was determined using the Sigma Glucose Assay Kit (GAG0). (G) Differentiation state of the cells was determined after ZMIZ1 knockdown by performing flow cytometry for the T-cell markers that distinguish ETP-ALL cells(28). Values are shown as means  $\pm$  standard deviation. Two sample T-test was performed.
