# Supplementary material
Source: PubMed Central journal article supplement (PMC3549029)
Supplement: NIHMS423052-supplement-6.pdf [file NIHMS423052-supplement-6.pdf]

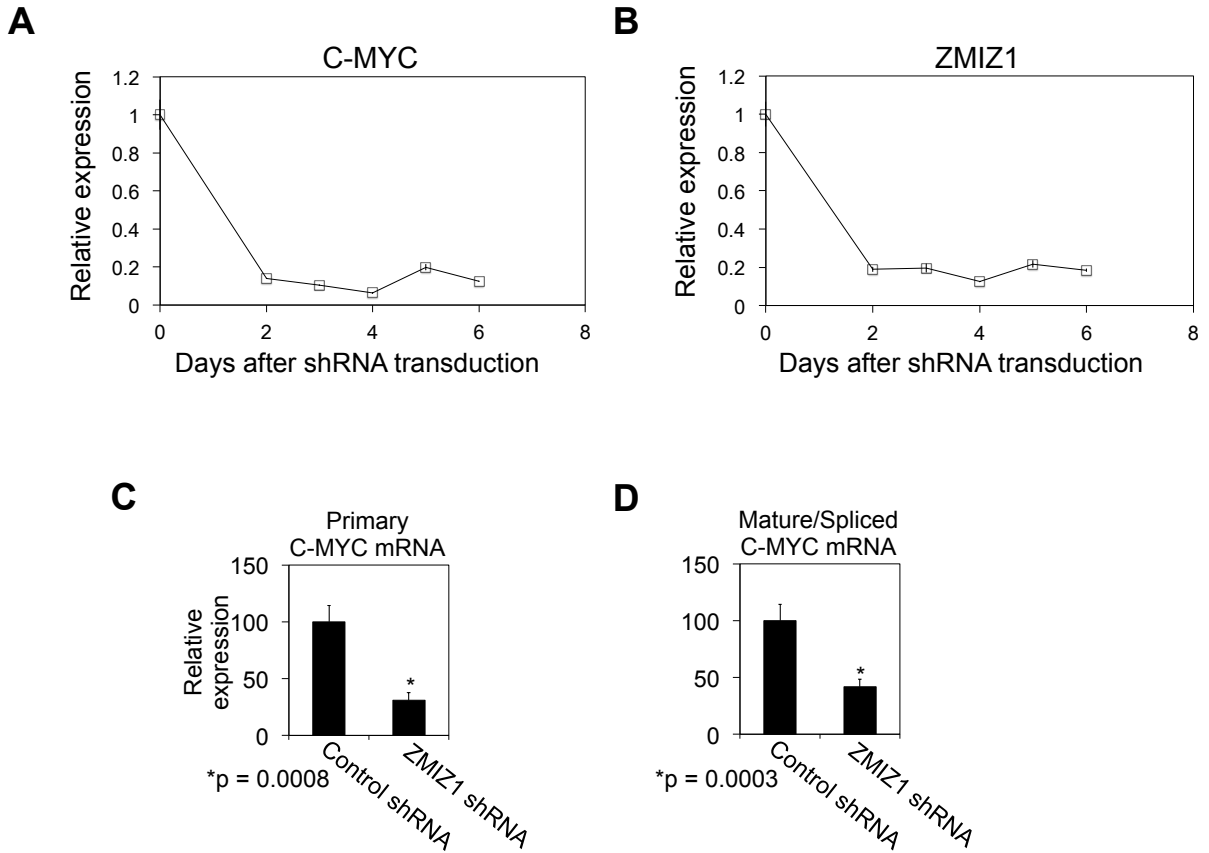

**Figure S5. The C-MYC pathway is downregulated after ZMIZ1 knockdown.** CEM cells were transduced with nonsilencing shRNA control or ZMIZ1-silencing shRNA-13 on day 0. Expression of C-MYC (A) and ZMIZ1 (B) were measured by qPCR for 6 days. The expression was measured relative to the expression of the control CEM cells on each day (set at 1 on Day 0) and normalized to 18S. Primary (C) and mature/spliced (D) C-MYC transcripts were compared at 5 days after transduction. Expression values are shown relative to control shRNA-transduced cells (set at 100) and normalized to 18S.
