# Supplementary material
Source: PubMed Central journal article supplement (PMC3549029)
Supplement: NIHMS423052-supplement-7.pdf [file NIHMS423052-supplement-7.pdf]

**A**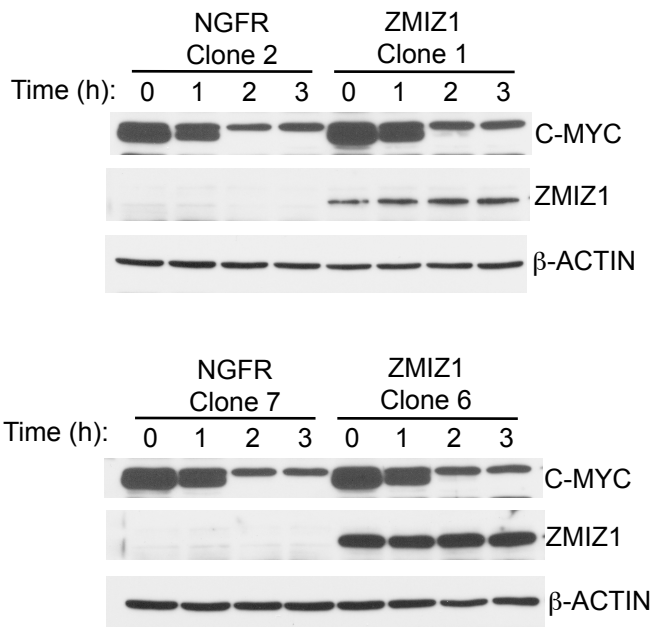**B**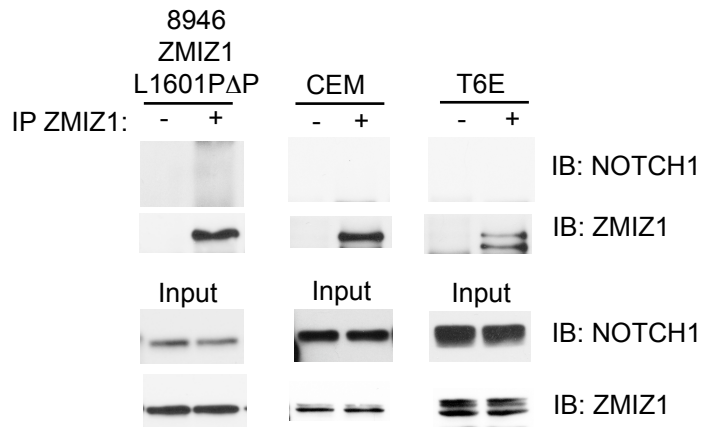

**Figure S6. ZMIZ1 does not regulate C-MYC post-transcriptionally or bind NOTCH1.** (A) 8946 cells were transduced with NGFR empty vector or ZMIZ1 and then subcloned twice by limiting dilution. NGFR subclones (2 and 7) and ZMIZ1 subclones (1 and 6) were treated with doxycycline to downregulate C-MYC transcription. ZMIZ1 and C-MYC protein levels were measured over time.  $\beta$ -ACTIN expression is shown as a loading control. (B) Whole cell lysates from three ZMIZ1-expressing cell lines – 8946 cells transduced with ZMIZ1 and L1601P $\Delta$ P, CEM cells, and T6E cells – were subjected to immunoprecipitation with normal rabbit antibody (-) or ZMIZ1 antibody (+) followed by immunoblot (IB) with cleaved NOTCH1 antibody (V1744) or ZMIZ1 antibody. Input (2.5%) is shown as a control.
