# Supplementary material
Source: PubMed Central journal article supplement (PMC3549029)
Supplement: NIHMS423052-supplement-9.pdf [file NIHMS423052-supplement-9.pdf]

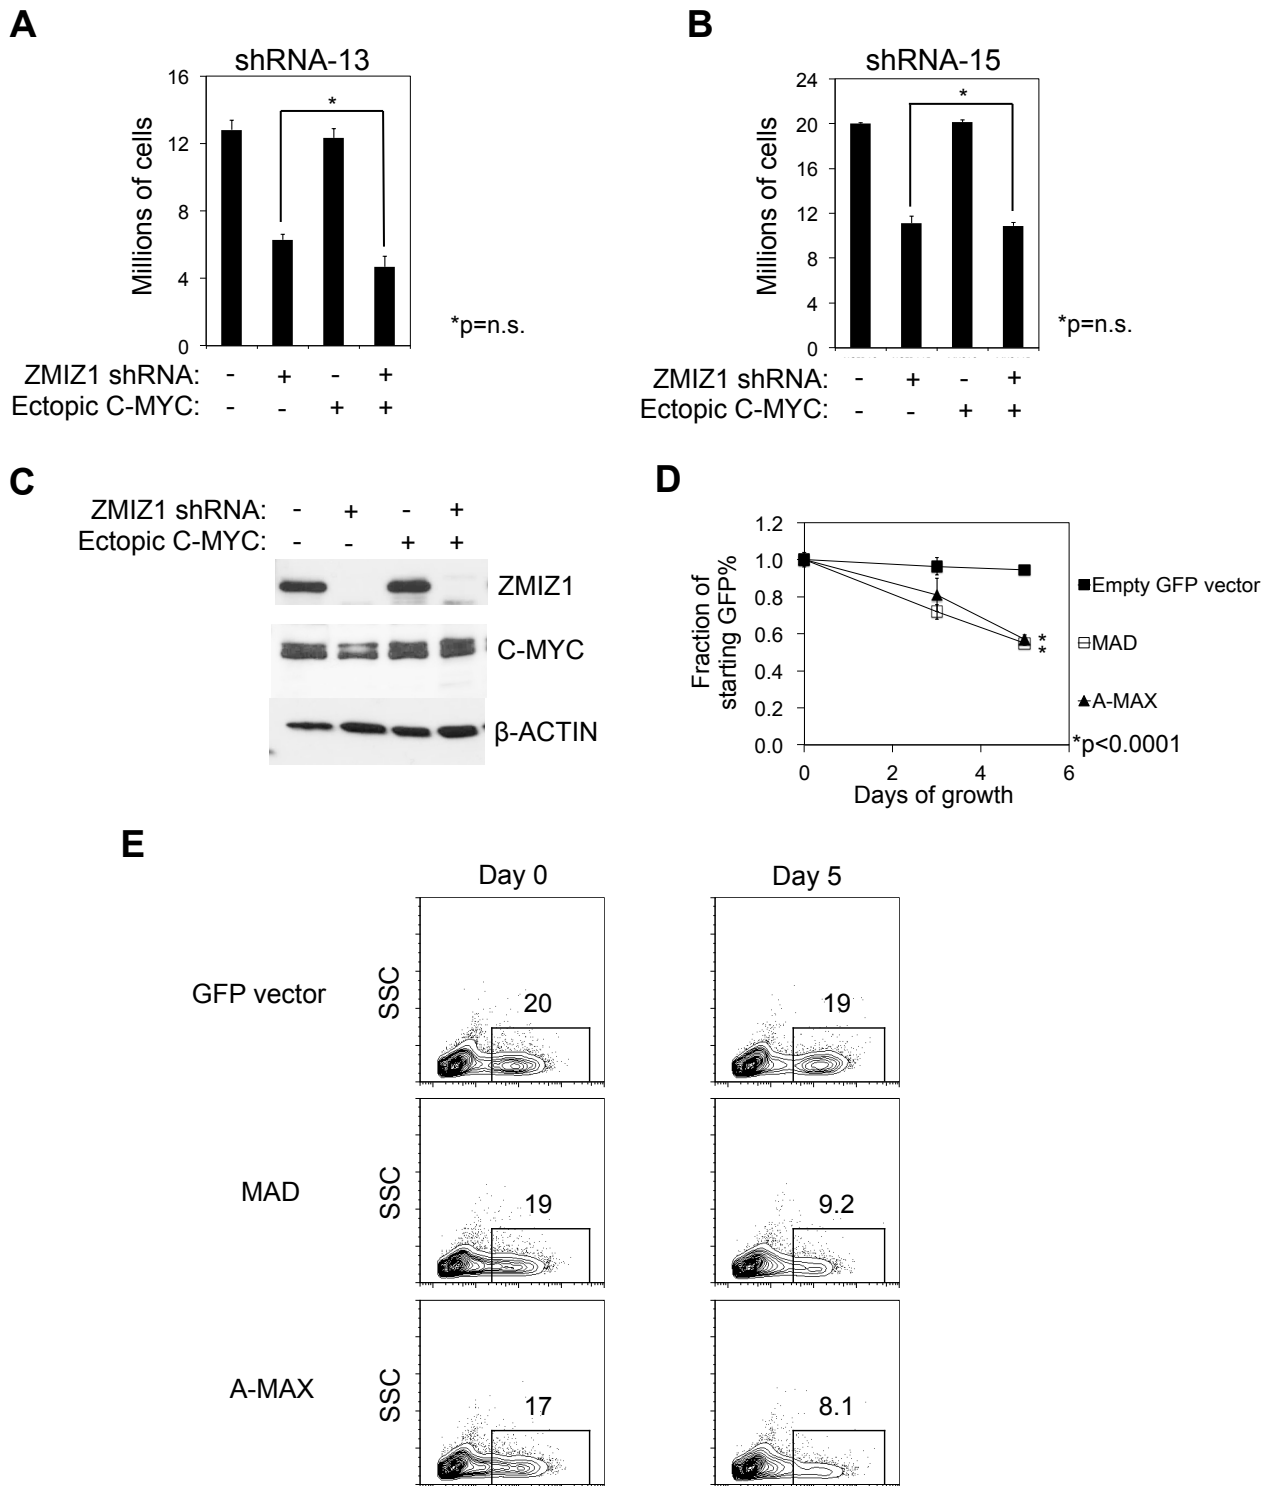

**Figure S8. C-MYC cannot substitute for ZMIZ1, but is a required effector of ZMIZ1 function.** CEM cells ectopically expressing C-MYC were transduced with ZMIZ1 shRNA-13 (A) or ZMIZ1 shRNA-15 (B) and counted by flow cytometry (C) ZMIZ1 and C-MYC expression in (B) was measured by Western blot. (D) CEM cells were transduced with MAD or A-MAX in triplicate. GFP% was then measured by flow cytometry over five days. (E) Representative flow cytometry plots are shown. Mean values are shown  $\pm$  standard deviation.
