# Supplementary material
Source: PubMed Central journal article supplement (PMC3549029)
Supplement: NIHMS423052-supplement-11.pdf [file NIHMS423052-supplement-11.pdf]

**A**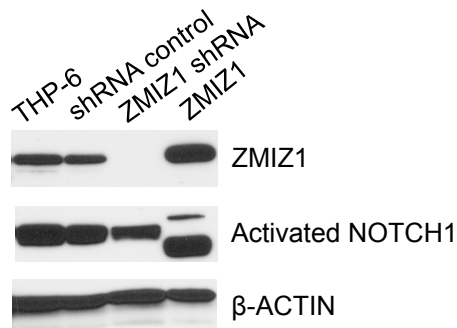**B**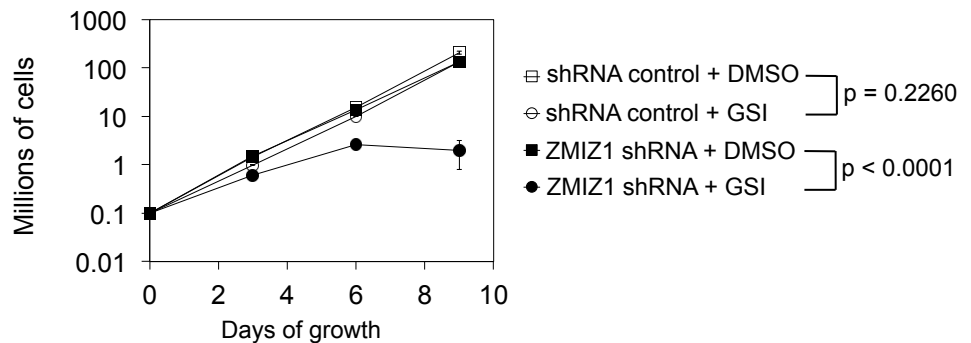**C**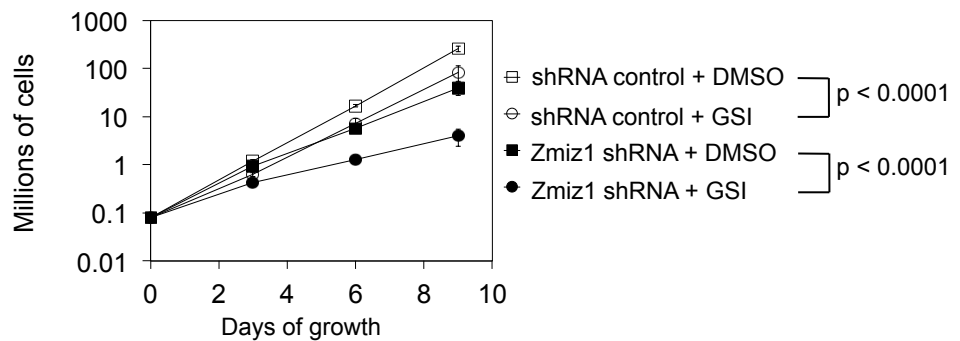

**Figure S10. ZMIZ1 inhibition sensitizes leukemic cells to NOTCH inhibitors.** (A-B) THP-6 cells were transduced with nonsilencing shRNA control or ZMIZ1-silencing shRNA-15. 5 days later, ZMIZ1 protein was measured with Western blot (A). β-ACTIN expression is shown as loading control. ZMIZ1 lane = positive control, 8946 cells transduced with ZMIZ1 and L1601PΔP retroviruses. Sizes of mutant NOTCH1 proteins vary depending on the sizes of the C-terminal PEST truncations. (B) Transduced THP6 cells were treated with DMSO or GSI (1 μM DBZ) and counted by PI-exclusion with flow cytometry. Log scaled y-axis is shown. P<0.0001 for interaction test using an ANOVA model of log-transformed data on Day 9 counts (C) T6E cells were transduced with nonsilencing shRNA control or Zmiz1-silencing shRNA-m16. Transduced T6E cells were treated with DMSO or GSI (10 nM DBZ) and counted by PI-exclusion with flow cytometry. P=0.0152 for interaction test using an ANOVA model of log-transformed data on Day 9 counts.
