# Supplementary material
Source: PubMed Central journal article supplement (PMC3549029)
Supplement: NIHMS423052-supplement-12.pdf [file NIHMS423052-supplement-12.pdf]

Table S1. QPCR primers used in this study

| Gene                   | Species | Forward primer       | Reverse primer        |
|------------------------|---------|----------------------|-----------------------|
| <i>C-MYC (mature)</i>  | human   | CTCGGATTCTGCTCTCCT   | TCTTGTTCTCCTCAGAGTCG  |
| <i>MEF2C</i>           | human   | GCGCTGATCATCTTCAAC   | CTTTGCCTGCTGATCATT    |
| <i>ZMIZ1</i>           | human   | TACAGCCAAGGGAATGTCAA | GACAGGTATGGAGGGATGCT  |
| <i>CCND2</i>           | human   | CCAACACAGACGTGGATTGT | GTTTCATCCTCCGACTTGGAT |
| <i>SLC1A4</i>          | human   | CTGTGGACTGGATTGTGGAC | TCCACTTTCACCTCAGCAAG  |
| <i>SLC16A1</i>         | human   | CATTTCCATCGGCTTCTCTT | GCTGATAGGACCTCCACCAT  |
| <i>Zmiz1</i>           | mouse   | CTATGGACAGGCACATCCAG | AATCCAGCAGCTCTGTAGCA  |
| <i>DKC1</i>            | human   | TTGCATGTGGTTCAAATCCT | CTGTCTTCTCCACCCGAAGT  |
| <i>C-MYC (primary)</i> | human   | CGCACCAAGACCCCTTTAAC | AAATACGGCTGCACCGAGTC  |
| <i>ODC1</i>            | human   | GAAGAGATCACCGGCGTAAT | TTAACTGCAAGCGTGAAAGC  |
