# Supplementary material
Source: PubMed Central journal article supplement (PMC3549029)
Supplement: NIHMS423052-supplement-13.pdf [file NIHMS423052-supplement-13.pdf]

Table S2. Enrichment analysis of differentially regulated genes (fold change>1.3, p<0.01) after ZMIZ1 knockdown using C-MYC-related gene lists in the MSigDB Version 3.0 database

| Title of MYC gene list           | Direction of expression with ZMIZ1 knockdown | Number of genes in gene list | Number of those genes in our list | Actual p-value | Estimated false discovery rate (Q-value) |
|----------------------------------|----------------------------------------------|------------------------------|-----------------------------------|----------------|------------------------------------------|
| COLLER_MYC_TARGETS_UP            | DOWN                                         | 12                           | 6                                 | 9.3E-06        | 0.00025                                  |
| KIM_MYC_AMPLIFICATION_TARGETS_UP | DOWN                                         | 153                          | 21                                | 1.7E-05        | 0.00034                                  |
| SCHUHMACHER_MYC_TARGETS_UP       | DOWN                                         | 67                           | 12                                | 8.2E-05        | 0.0013                                   |
| DANG_BOUND_BY_MYC                | DOWN                                         | 1035                         | 74                                | 5.5E-04        | 0.0050                                   |
| DANG_MYC_TARGETS_UP              | DOWN                                         | 126                          | 15                                | 0.0012         | 0.0091                                   |
| DANG_REGULATED_BY_MYC_DN         | DOWN                                         | 238                          | 23                                | 0.0014         | 0.01                                     |
| BENPORATH_MYC_MAX_TARGETS        | DOWN                                         | 764                          | 55                                | 0.0024         | 0.016                                    |
| KIM_MYC_AMPLIFICATION_TARGETS_DN | DOWN                                         | 65                           | 6                                 | 0.095          | >0.05                                    |
| FERNANDEZ_BOUND_BY_MYC           | DOWN                                         | 174                          | 12                                | 0.14           | >0.25                                    |
| MENSSSEN_MYC_TARGETS             | DOWN                                         | 15                           | 2                                 | 0.16           | >0.25                                    |
| DANG_REGULATED_BY_MYC_UP         | DOWN                                         | 65                           | 5                                 | 0.21           | >0.25                                    |
| BILD_MYC_ONCOGENIC_SIGNATURE     | DOWN                                         | 197                          | 12                                | 0.25           | >0.25                                    |
| DANG_MYC_TARGETS_DN              | DOWN                                         | 30                           | 2                                 | 0.43           | >0.25                                    |
| BENPORATH_MYC_TARGETS_WITH_EBOX  | DOWN                                         | 220                          | 11                                | 0.51           | >0.25                                    |
| COLLER_MYC_TARGETS_DN            | DOWN                                         | 4                            | 0                                 | 1              | >0.25                                    |
| SCHUHMACHER_MYC_TARGETS_DN       | DOWN                                         | 7                            | 0                                 | 1              | >0.25                                    |
|                                  |                                              |                              |                                   |                |                                          |
| BENPORATH_MYC_MAX_TARGETS        | UP                                           | 764                          | 122                               | 1.28E-07       | 0                                        |
| DANG_BOUND_BY_MYC                | UP                                           | 1035                         | 151                               | 1.25E-06       | 0                                        |
| DANG_REGULATED_BY_MYC_DN         | UP                                           | 238                          | 34                                | 0.022          | >0.05                                    |
| SCHUHMACHER_MYC_TARGETS_DN       | UP                                           | 7                            | 3                                 | 0.026          | >0.05                                    |
| DANG_MYC_TARGETS_DN              | UP                                           | 30                           | 7                                 | 0.026          | >0.05                                    |
| KIM_MYC_AMPLIFICATION_TARGETS_DN | UP                                           | 65                           | 9                                 | 0.2            | >0.25                                    |
| BILD_MYC_ONCOGENIC_SIGNATURE     | UP                                           | 197                          | 23                                | 0.25           | >0.25                                    |
| COLLER_MYC_TARGETS_UP            | UP                                           | 12                           | 1                                 | 0.72           | >0.25                                    |
| BENPORATH_MYC_TARGETS_WITH_EBOX  | UP                                           | 220                          | 18                                | 0.85           | >0.25                                    |
| DANG_MYC_TARGETS_UP              | UP                                           | 126                          | 9                                 | 0.9            | >0.25                                    |
| FERNANDEZ_BOUND_BY_MYC           | UP                                           | 174                          | 12                                | 0.94           | >0.25                                    |
| DANG_REGULATED_BY_MYC_UP         | UP                                           | 65                           | 3                                 | 0.96           | >0.25                                    |
| SCHUHMACHER_MYC_TARGETS_UP       | UP                                           | 67                           | 2                                 | 0.99           | >0.25                                    |
| KIM_MYC_AMPLIFICATION_TARGETS_UP | UP                                           | 153                          | 5                                 | 1              | >0.25                                    |
| MENSSSEN_MYC_TARGETS             | UP                                           | 15                           | 0                                 | 1              | >0.25                                    |
| COLLER_MYC_TARGETS_DN            | UP                                           | 4                            | 0                                 | 1              | >0.25                                    |
