# Supplementary material
Source: PubMed Central journal article supplement (PMC3549029)

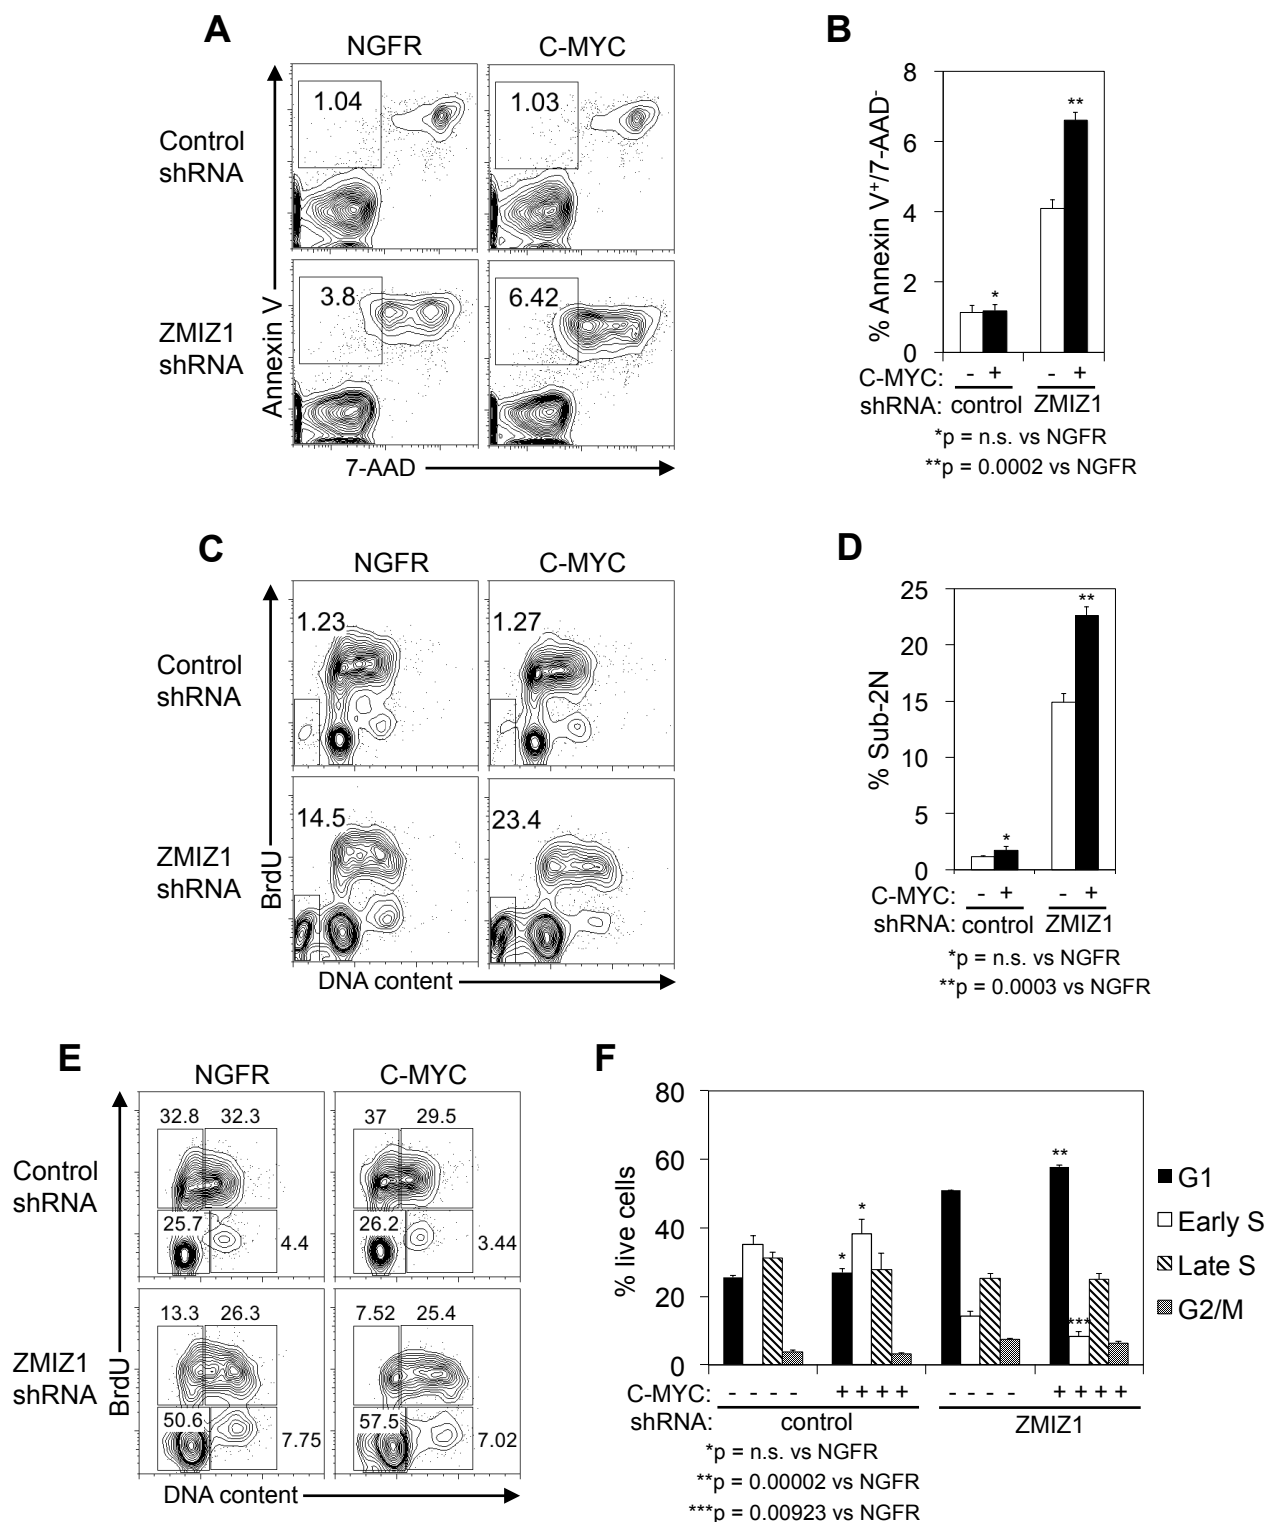

Supplement: NIHMS423052-supplement-10.pdf [file NIHMS423052-supplement-10.pdf]
